# Supplementary material
Source: PubMed Central journal article supplement (PMC3959236)
Supplement: NIHMS541831-supplement-Supp_Fig_S1.pdf [file NIHMS541831-supplement-Supp_Fig_S1.pdf]

# Supplementary Figure 1

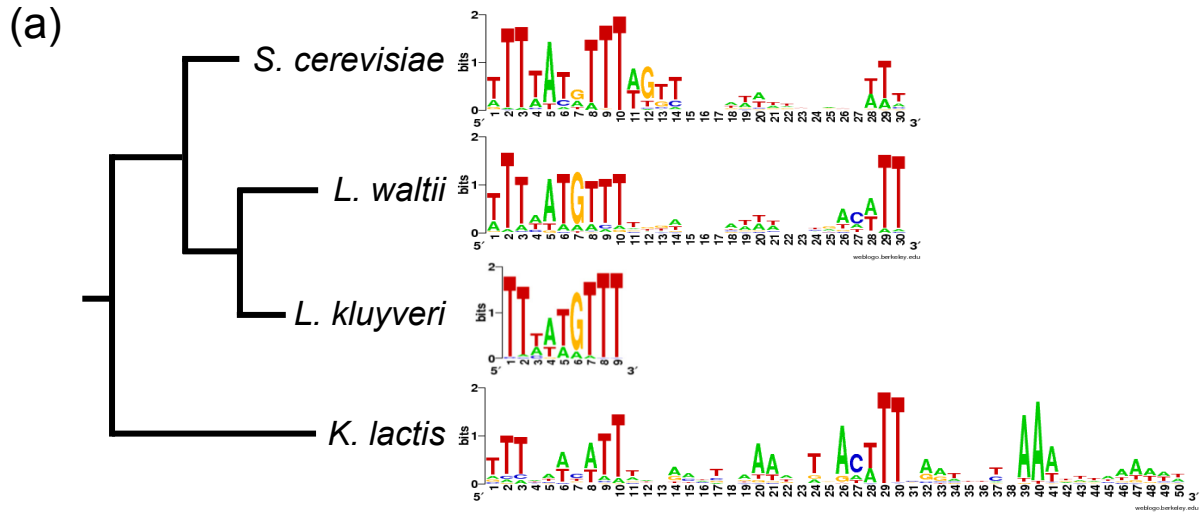

(b)

**ARS** 1 TCAACATCTTTGGATAATATCAGAATGAGAAAGAACAGATACGCAGTACGTTTTTTGGTGAGCTCTTTGCACTTC 75  
**OPT** 1 TCAACATCTTTGGATAATATCAGAATGAGAAAGAACAGATACGCAGTACGTTTTTTGGTGAGCTCTTTGCACTTC 75

76 TTTAGTTCTTTCCATCAATATCAGTTGCTTATGCACTTATGACTAATATTGATGTTAACTTCAATATCTTTAAA 150  
 76 TTTAGTTCTTTCCATCAATATCAGTTtTTAAaCttTTAgGACTAAaAgTGATGTTAACTTCAAAATgTTTAAA 150

151 CTTTGTCTTCCCGACGTTTCATTAAGAATACTAATACACTTTAATAATTAGTTTAAATATTTGTTTCTATATAAT 225  
 151 aTTTGTCTTCCCGACGTTTCATTAAGAATACTAATACACTTTAATAATTAtTTTAAATATTTtgTTCTAaATAAT 225

226 GACATTTAATTAAGAAAAAGATAAAAATATAAAAAACATCATAATAACTCACCAGAGGTTAAGAACAAAAAACAATTT 300  
 226 GACtTTAATTAAGAAAAAGATAAAAATATAAAAAACATCATAATAACTCACCAGAGGTTAAGAACAAAAAACAATTT 300

300 AGATATCTGCTAATCCAATATAGTTAAATCAATCTTTCCTTGGTATAATGGGTATATTACATATATTTCAAGGAC 375  
 300 AGATATCTGCTAATCCAATATAGTTAAATCAATCTTTCCTTGGTATAATGGGTATATTACATATATTTCAAGGAC 375

376 CGACACTCCTACCAAATATCTAAAATTTACCATATTAACATAACATGTATATAAACGTCAAATCATAATCAGCAC 450  
 376 CGACACTCCTACCAAATATCTAAAATTTACCATATTAACATAACATGTATATAAACGTCAAATCATAATCAGCAC 450

451 TA 452  
 451 TA 452

 *K. lactis* (primary)       *K. lactis* (secondary)  
 *S. cerevisiae, L. waltii, L. kluyveri*
