# Supplementary material
Source: PubMed Central journal article supplement (PMC3959236)
Supplement: NIHMS541831-supplement-Supp_Figure_S2.pdf [file NIHMS541831-supplement-Supp_Figure_S2.pdf]

## Supplementary Figure 2

(a)

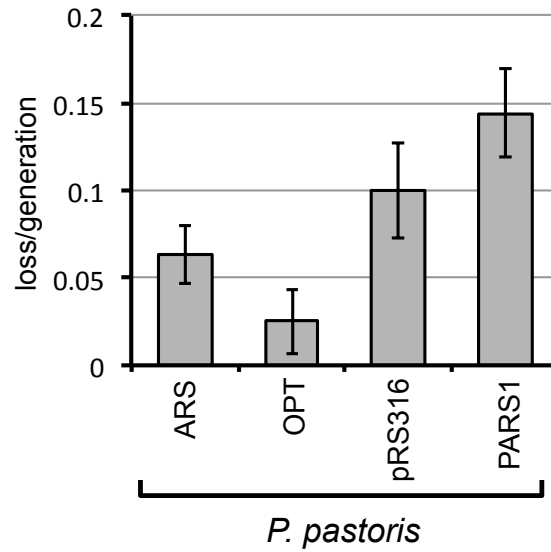

(b)

| Plasmid 1 | Plasmid 2 | T-test Pval |
|-----------|-----------|-------------|
| ARS       | OPT       | 0.0115      |
| ARS       | PARS1     | 0.0002      |
| ARS       | pRS316    | 0.0310      |
| OPT       | PARS1     | 0.00002     |
| OPT       | pRS316    | 0.002       |
| PARS1     | pRS316    | 0.0140      |
